# Supplementary material for: Pitfalls in mutational testing and reporting of common KIT and PDGFRA mutations in gastrointestinal stromal tumors
Source: Springer Nature journal article supplement (doi:10.1186/1471-2350-11-106), 2010-07-04
Supplement: Additional file 4 [file 1471-2350-11-106-s4.doc]

**Additional file 4. Tables AF1-4.**

**Table AF 1. Kits used for DNA extraction**

| Lab | Kit for DNA extraction |
| --- | --- |
| A | BioRobot M48/ QIAmp DNA Mini-Kit (Qiagen, Hilden, Germany) |
| B | QIAmp DNA Mini-Kit (Qiagen, Hilden, Germany) |
| C | QIAmp DNA Mini-Kit (Qiagen, Hilden, Germany) |
| D | Pure Gene Tissue Kit (Qiagen, Hilden, Germany) |
| E | Nucleospin Tissue Kit (Macherey & Nagel, Düren, Germany) |
| F | Magna Pure (Roche, Mannheim, Germany) |

**Table AF 2. Primersets and conditions for PCR amplification of *KIT* exon 9 and 11 and *PDGFRA*** exon18

| Lab | Exon | forward primer (5’-3’) | PCR enzyme | annealing  temp. [°C] | no. of cycle | length  in bp |
| --- | --- | --- | --- | --- | --- | --- |
| reverse primer (5’-3) |
| A | 9 | agtgcattcaagcacaatgg | HotStar Taq (Qiagen, Hilden, Germany) | 57 | 40 | 146 |
| gacagagcctaaacatcccc |
| 11 | gtgctctaatgactgagac | 57 | 40 | 232 |
| tacccaaaaaggtgacatgg |
| 18 | catggatcagccagtcttgc | 60 | 40 | 256 |
| tgaaggaggagtagcctgac |
| B | 9 | cagggcttttgttttcttcc | Platinum Taq  (Invitrogen, Karlsruhe, Germany) | 57 | 45 | 266 |
| atcatgactgatatggtagacagagc |
| 11 | gtgctctaatgactgagac | 57 | 45 | 232 |
| tacccaaaaaggtgacatgg |
| 18 | cagctacagatggcttgatc | 57 | 40 | 213 |
| gaaggaggatgagcctgac |
| C | 9 | tcctagagtagcagggctt | AmpliTaq Gold  (Applied Biosystems, Darmstadt, Germany) | 54 | 50 | 284 |
| tggtagacagagctaacatcc |
| 11 | ccagagtgctctaatgactg | 54 | 50 | 215 |
| agcccctgtttcatactgac |
| 18 | cagggtgatgctattcagc | 54 | 50 | 238 |
| gattaaagtgaagaggatgagc |
| D | 9 | gccacatcccaagtgttttatg | Fideliti Taq (USB, Cleveland, USA) | 55 | 40 | 310 |
| gagcctaaacatccccttaaattg |
| 11 | ccagagtgctctaatgactg | 60 | 40 | 215 |
| agcccctgtttcatactgac |
| 18 | tcttgcaggggtgatgctat | 55 | 40 | 265 |
| agaagcaacacctgactttagagatta |
| E | 9 | cta gag taa gcc agg gct ttt gtt | Hot Goldstar (Eurogentec, Köln, Germany) | 64 | 35 | 270 |
| cct aaa cat ccc ctt aaa ttg gat t |
| 11 | aaaggtgatctatttttccctttctc | 64 | 35 | 199 |
| ccaaaaaggtgacatggaaagc |
| 18 | cag ggg tga tgc tat atc agc | 64 | 35 | 214 |
| gtc cag tgt ggg aag tgt gga c |
| F | 9 | tcctagagtaagccagggctt | Fermentas Taq (Fermentas, St.Leon-Roth, Germany) | 65-55  55 | 10  30 | 294 |
| tggtagacagagcctaaacatcc |
| 11 | gatgattctgacctacaaat | 65-55  55 | 10  30 | 342 |
| aggaagccactggagttcctt |
| 18 | accatggatcagccagtctt | 65-55  55 | 10  30 | 264 |
| tgaaggaggatgagcctgacc |

Table AF 3. Purification of PCR products prior to cycle sequencing

| Lab | Purification Method | Purification Kit |
| --- | --- | --- |
| A | polyethylenglycol precipitation | - |
| B | - | Wizard columns (Promega, Madison, USA) |
| C | - | Exo Sap-IT (USB, Cleveland, USA) |
| D | - | High Pure PCR purification kit (Roche, Mannheim, Germany) |
| E | - | Mini Elute PC purification kit (Qiagen, Hilden, Germany) |
| F | - | QIAquick PCR purification kit (Qiagen, Hilden, Germany) |

Table AF 4. Kits, devices and conditions used for cycle sequencing

| Lab | Kit | Capillary/Gel Electrophoresis | Primer | Cycling program | |
| --- | --- | --- | --- | --- | --- |
|  |  |  |  | Annealing | Cycles |
| A | Big Dye Terminator 1.1 (Applied Biosystems) | ABI 3130 Genetic Analyzer (Applied Biosystems) | as above | Exon 9: 55°C  Exon 11: 55°C  Exon 18: 60°C | 25  25  25 |
| B | Sequencing is done in an external lab (SeqLab, Göttingen, Germany) | | | | |
| C | Big Dye Terminator 1.1 (Applied Biosystems) | ABI 3130 Genetic Analyzer (Applied Biosystems) | as above | Exon 9: 54°C  Exon 11: 54°C  Exon 18:58°C | 25  25  25 |
| D | DYEnamic ET Terminator Cycle Sequencing Kit (GE Healthcare) | ABI 377 DNA Sequencer (Applied Biosystems) | as above | Exon 9: 50°C  Exon 11: 50°C  Exon 18: 50°C | 25  25  25 |
| E | Big Dye Terminator 1.1 (Applied Biosystems) | ABI 3100 Genetic Analyzer (Applied Biosystems) | as above | Exon 9: 50°C  Exon 11: 50°C  Exon 18: 55°C | 25  25  25 |
| F | Big Dye Terminator 1.1 (Applied Biosystems) | ABI 310 Genetic Analyzer (Applied Biosystems) | as above | Exon 9: 52°C  Exon 11: 52°C  Exon 18:52 °C | 25  25  25 |
